# Supplementary material for: Aggregation tendencies in the p53 family are modulated by backbone hydrogen bonds
Source: PubMed Central journal article supplement (PMC5013286; doi:10.1038/srep32535), 2016-09-07
Supplement: srep32535-s1.pdf [file srep32535-s1.pdf]

# Aggregation tendencies in the p53 family are modulated by backbone hydrogen bonds

Elio A. Cino\*, Iaci N. Soares, Murilo M. Pedrote, Guilherme A.P. de Oliveira, and Jerson L. Silva

\*Elio A. Cino, Programa de Biologia Estrutural, Instituto de Bioquímica Médica Leopoldo de Meis, Instituto Nacional de Biologia Estrutural e Bioimagem, Centro Nacional de Ressonância Magnética Nuclear Jiri Jonas, Universidade Federal do Rio de Janeiro, 21941-902, Rio de Janeiro, RJ, Brasil. E-mail: [eliocino@gmail.com](mailto:eliocino@gmail.com)

Supplementary Table 1. Comparison of parameters from MD simulations<sup>a</sup>.

|                                                                      | p53              | p63              | p73              | p53 R175H        | p53 Ext          |
|----------------------------------------------------------------------|------------------|------------------|------------------|------------------|------------------|
| C $\alpha$ RMSD <sup>b</sup> (nm)                                    | 0.27 $\pm$ 0.01  | 0.22 $\pm$ 0.02  | 0.24 $\pm$ 0.01  | 0.27 $\pm$ 0.04  | 0.18 $\pm$ 0.02  |
| Fraction native C $\alpha$ contacts <sup>c</sup>                     | 0.60 $\pm$ 0.02  | 0.68 $\pm$ 0.02  | 0.69 $\pm$ 0.04  | 0.61 $\pm$ 0.03  | 0.78 $\pm$ 0.04  |
| Secondary structure <sup>b,d</sup>                                   | 0.60 $\pm$ 0.03  | 0.57 $\pm$ 0.03  | 0.58 $\pm$ 0.03  | 0.60 $\pm$ 0.03  | 0.57 $\pm$ 0.03  |
| Radius of gyration (nm)                                              | 1.64 $\pm$ 0.01  | 1.65 $\pm$ 0.01  | 1.66 $\pm$ 0.01  | 1.63 $\pm$ 0.01  | 1.63 $\pm$ 0.01  |
| Number of C $\alpha$ -C $\alpha$ contacts within 1.0 nm <sup>b</sup> | 8.4 $\pm$ 0.1    | 8.2 $\pm$ 0.1    | 8.2 $\pm$ 0.02   | 8.3 $\pm$ 0.004  | 8.4 $\pm$ 0.05   |
| Intramolecular backbone hydrogen bonds <sup>b</sup>                  | 0.41 $\pm$ 0.01  | 0.40 $\pm$ 0.002 | 0.41 $\pm$ 0.001 | 0.41 $\pm$ 0.001 | 0.39 $\pm$ 0.01  |
| Total intramolecular hydrogen bonds <sup>b</sup>                     | 0.74 $\pm$ 0.004 | 0.69 $\pm$ 0.01  | 0.70 $\pm$ 0.004 | 0.71 $\pm$ 0.01  | 0.73 $\pm$ 0.004 |
| Protein-water hydrogen bonds <sup>b</sup>                            | 2.2 $\pm$ 0.05   | 2.2 $\pm$ 0.05   | 2.2 $\pm$ 0.01   | 2.2 $\pm$ 0.004  | 2.1 $\pm$ 0.01   |

<sup>a</sup>Values reported correspond to avg.  $\pm$  s.d. between the two replicates.

<sup>b</sup>Values normalized per residue.

<sup>c</sup>C $\alpha$  deviations <0.15 nm from the initial structure were classified as native contacts.

<sup>d</sup>Sum of residues in  $\alpha$ -helix,  $\beta$ -sheet,  $\beta$ -bridge, and turn conformations, as classified by DSSP.
